# Supplementary material for: Nanofibrous Conductive Sensor for Limonene: One-Step Synthesis via Electrospinning and Molecular Imprinting
Source: Preprints.org preprint supplement (doi:10.20944/preprints202405.1676.v1), 2024-05-27
Supplement: Supplementary file 2 [file supplementary]

Archive with 1 entries (1 files):
- Supplementary Material.pdf
